# Supplementary material
Source: PubMed Central journal article supplement (PMC5863913)
Supplement: NIHMS948282-supplement-supplement_1.pdf [file NIHMS948282-supplement-supplement_1.pdf]

Supplementary Figure 1

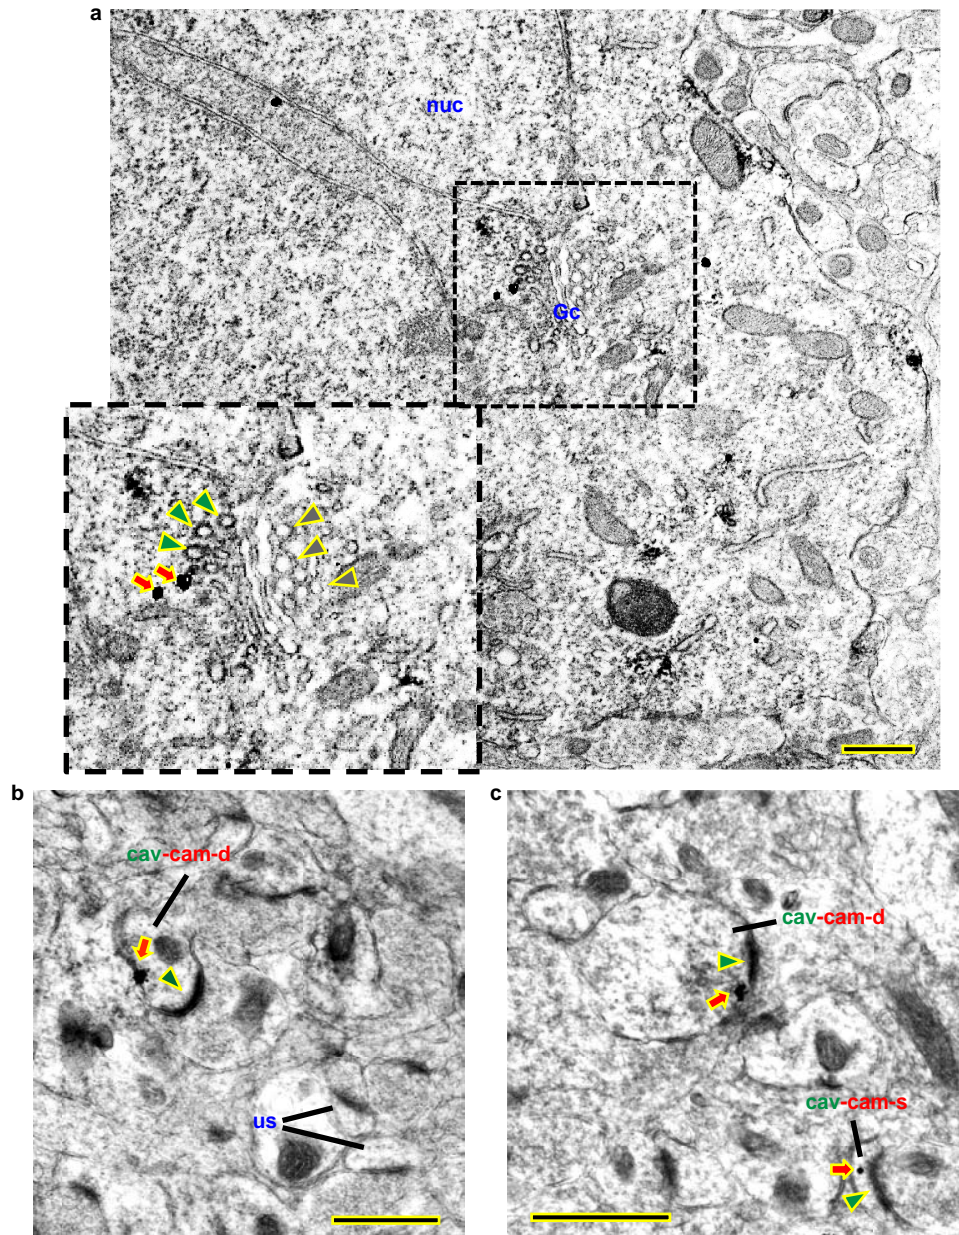

Supplementary Figure 2

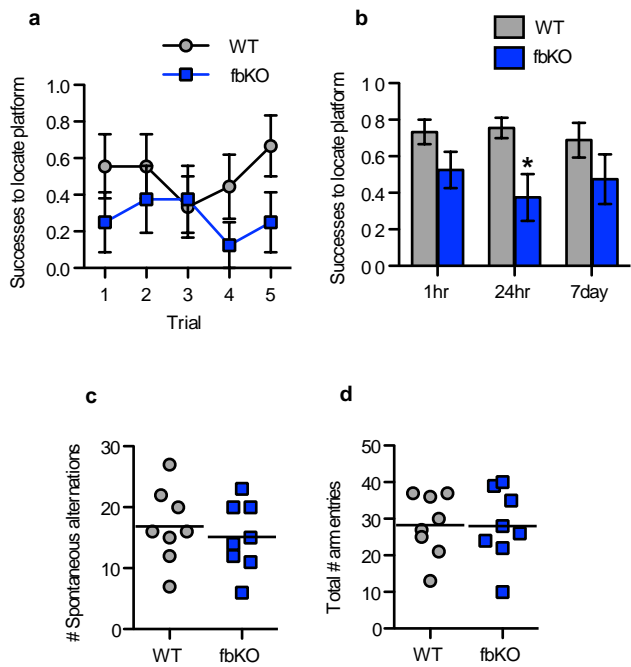

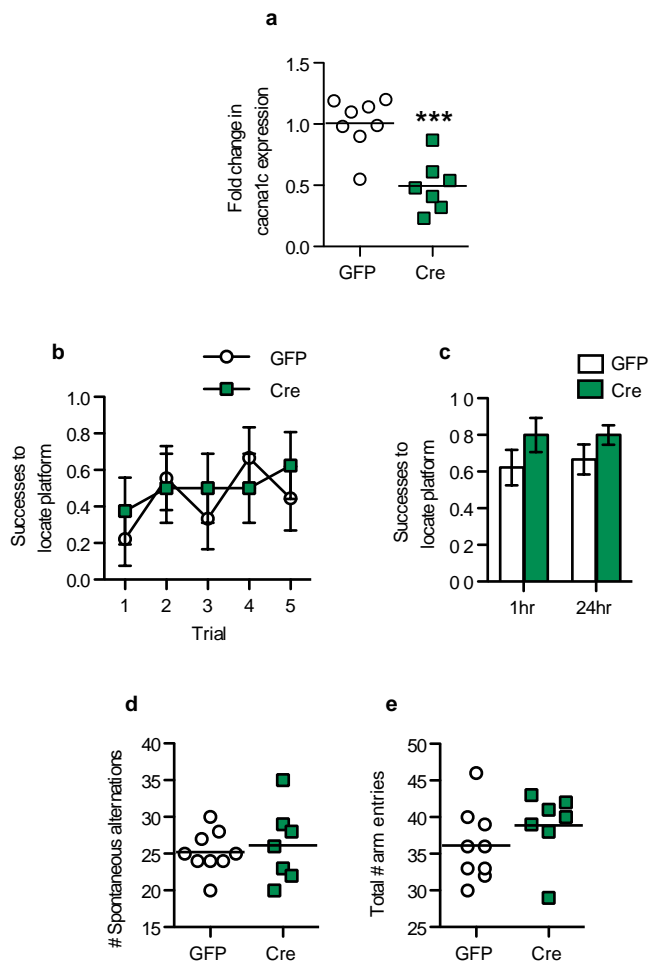

Supplementary Figure 4

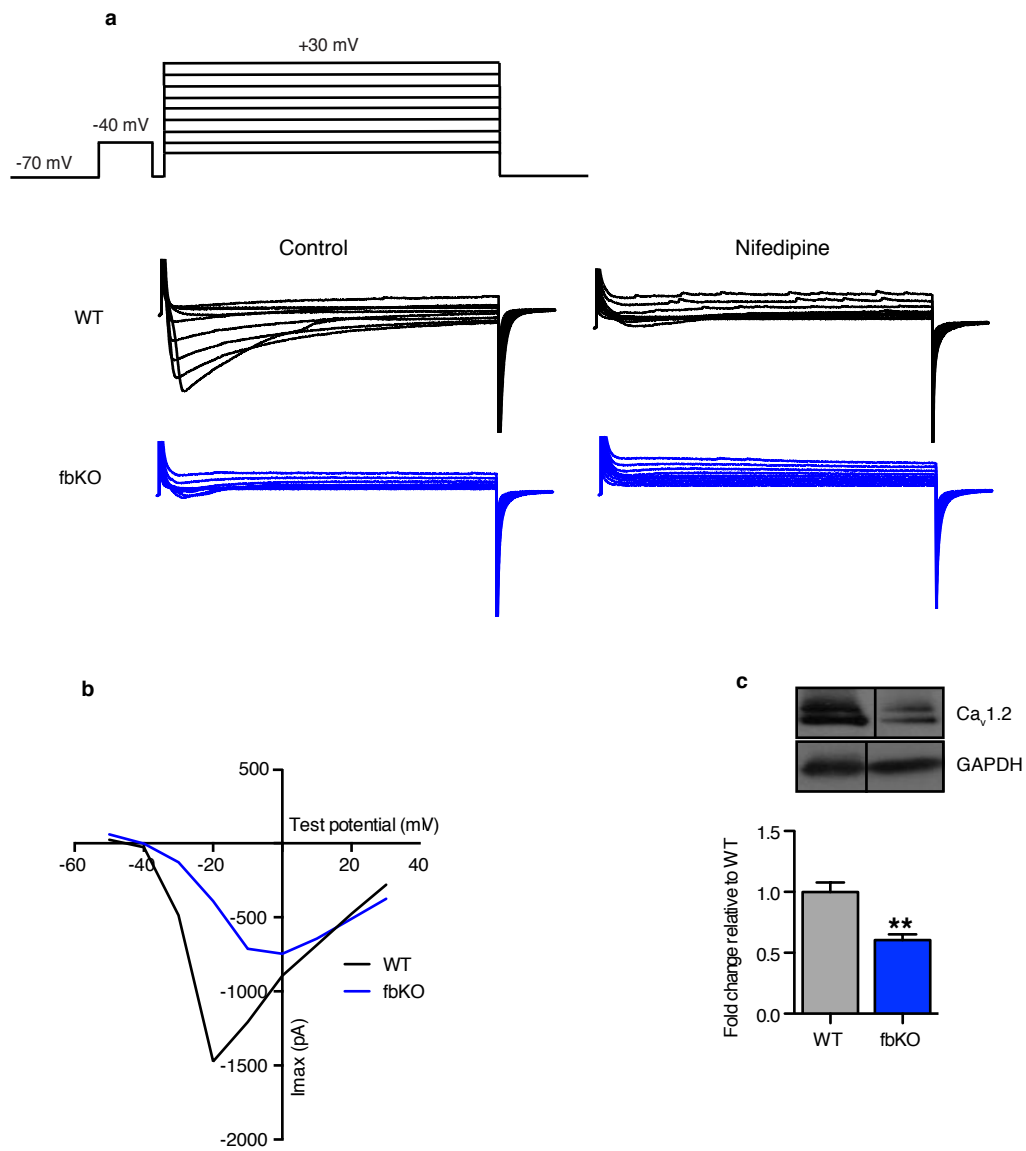

Supplementary Figure 5

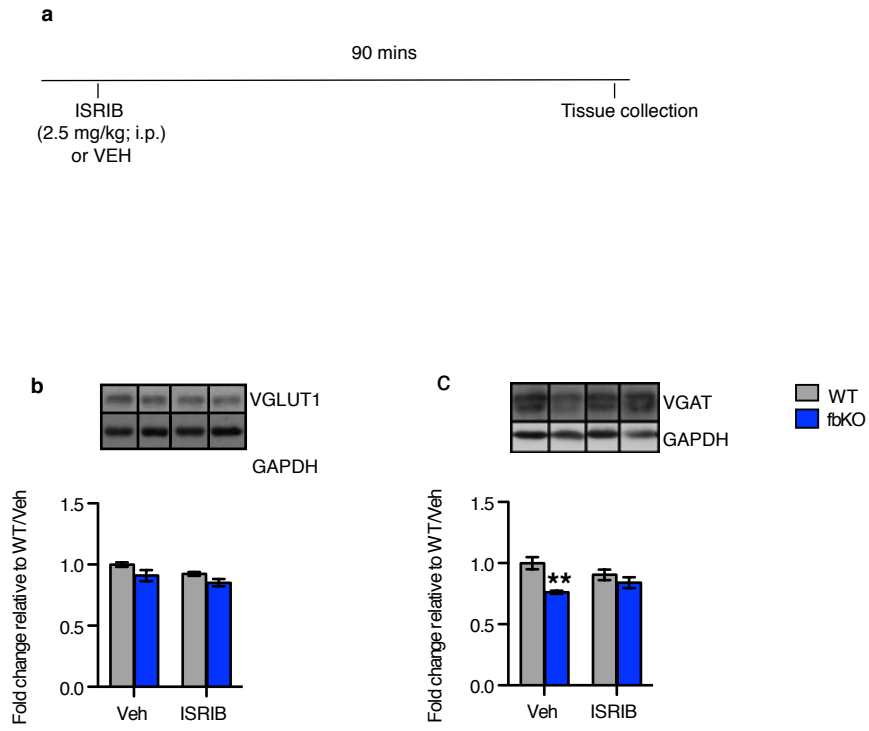

1 **SUPPLEMENTARY FIGURE LEGENDS**

2 **Supplementary Figure 1.  $Ca_v1.2$  and CaMKII are co-expressed in PFC neurons,**  
3 **present in dendritic shafts and dendritic spines, and are affiliated with the**  
4 **postsynaptic density and extra- and perisynaptic plasma membrane.**

5 (a) Electron micrograph showing the soma of a PFC neuron that expresses  
6 immunoperoxidase labeling for  $Ca_v1.2$  and silver-gold labeling for CaMKII. As shown in  
7 the dashed box, labeling for each protein is associated with a Golgi complex (Gc)  
8 adjacent to the nucleus (nuc). The Gc is shown at a higher magnification in the insert to  
9 better visualize  $Ca_v1.2$  (green arrow heads) and CaMKII (red arrows) labeled vesicles.  
10 Unlabeled vesicles (gray arrow heads) are shown for comparison. (b) A small dendritic  
11 shaft shows labeling for both  $Ca_v1.2$  and CaMKII (cav-cam-d). This profile illustrates  
12 dense immunoperoxidase reaction product for  $Ca_v1.2$  within the postsynaptic density  
13 (green arrow head) and an immunogold-silver aggregate for CaMKII (red arrow) located  
14 near the extrasynaptic plasma membrane. Dendritic spines (us) devoid of postsynaptic  
15  $Ca_v1.2$  labeling are seen in the nearby neuropil. (c) A dendritic profile and a spine profile  
16 are each co-labeled for  $Ca_v1.2$  and CaMKII. The dendritic profile (cav-cam-d) shows  
17 immunoperoxidase labeling for  $Ca_v1.2$  in the postsynaptic density (green arrow head) and  
18 also displays an immunogold-silver aggregate near the adjacent perisynaptic region of the  
19 plasma membrane (red arrow). The nearby neuropil contains a dually labeled spine (cav-  
20 cam-s) showing labeling for  $Ca_v1.2$  on the postsynaptic density (green arrow head) and  
21 CaMKII beneath this  $Ca_v1.2$  labeled structure (red arrow). Scale bars: 500 nm.

22

23 **Supplementary Figure 2. *Cacna1c* fbKO mice display impaired learning and**  
24 **memory but normal working memory.**

25 (a) Compared to WT mice, fbKO mice displayed fewer successes in locating the  
26 submerged platform in the Y-maze during training (Two-way ANOVA, main effect of  
27 genotype,  $F_{1,75} = 4.841$ ,  $p = 0.0309$ ; WT  $n = 9$ , fbKO  $n = 8$ ). (b) Compared to WT mice,  
28 fbKO mice displayed a trend towards fewer successes in locating the submerged platform  
29 in the Y-maze at 1 hour (Student's  $t$ -test,  $t(15) = 1.775$ ,  $p = 0.0962$ ) and significantly  
30 lower success at 24 hours (Student's  $t$ -test with Welch's correction,  $t(9) = 2.73$ ,  $p < 0.05$ )  
31 but not 7 days post-training (WT  $n = 9$ , fbKO  $n = 8$ ). (c, d) WT and fbKO mice displayed  
32 similar number of spontaneous alternations (c) and total arm entries (d) during the  
33 working memory task in the Y-maze (WT  $n = 8$ , fbKO  $n = 8$ ). \* $p < 0.05$  vs WT. Error  
34 bars represent mean  $\pm$  SEM.

35

36 **Supplementary Figure 3. Knockdown of *cacna1c* in the adult PFC of mice does not**  
37 **impair learning and memory or working memory.**

38 (a) Lower *cacna1c* mRNA levels in the PFC of Cre mice (Student's  $t$ -test,  $t(13) = 4.673$ ,  
39  $p = 0.0004$ ; GFP  $n = 8$ , Cre  $n = 7$ ). (b, c) GFP and Cre mice displayed similar level of  
40 successes in locating the submerged platform in the Y-maze during training (b) and the 1  
41 hour and 24 hour memory tests (c; GFP  $n = 9$ , Cre  $n = 8$ ). (d, e) GFP and Cre mice  
42 displayed similar number of spontaneous alternations (d) and total arm entries (e) during  
43 the working memory task in the Y-maze (GFP  $n = 8$ , Cre  $n = 8$ ). Error bars represent  
44 mean  $\pm$  SEM.

45

46 **Supplementary Figure 4. *Cacna1c* fbKO mice exhibit reduced amplitude of L-type**  
47 **calcium currents.**

48 (a) Pulse protocol used (top) and representative traces (bottom) of L-type calcium  
49 channel currents from layer 5 pyramidal neurons of the PFC with the L-type calcium  
50 channel blocker nifedipine. (b) Current-voltage relationship measured from subfigure a  
51 (WT n = 2, fbKO n = 4). (c) fbKO mice have significantly lower levels of Ca<sub>v</sub>1.2 protein  
52 in the synaptoneurosomes from the PFC (Student's *t*-test,  $t(11) = 4.192$ ,  $p < 0.01$ ). \*\* $p <$   
53  $0.01$  vs WT. Error bars represent mean  $\pm$  SEM.

54

55 **Supplementary Figure 5. ISRIB corrects the decreased protein levels of VGAT in**  
56 **the PFC of *cacna1c* fbKO mice**

57 (a) Outline of experimental design. Adult WT and fbKO mice were given a single  
58 systemic injection of either ISRIB (2.5 mg/kg, i.p) or vehicle and ninety minutes later  
59 sacrificed. (b) fbKO and WT mice have similar levels of synaptoneurosomal VGLUT1 in  
60 the PFC that remain unaltered with ISRIB treatment (Two-way ANOVA, main effect of  
61 genotype,  $F_{1,24} = 8.468$ ,  $p = 0.0077$ ; main effect of treatment,  $F_{1,24} = 5.679$ ,  $p = 0.0254$ ).  
62 (c) Vehicle treated fbKO mice have significantly lower levels of synaptoneurosomal  
63 VGAT protein in the PFC compared to WT vehicle mice that is normalized with ISRIB  
64 (Two-way ANOVA, main effect of genotype,  $F_{1,24} = 12.63$ ,  $p = 0.0016$ ; genotype x  
65 treatment,  $F_{1,24} = 4.201$ ,  $p = 0.0516$ ; Bonferroni *post-hoc* test, \*\* $p < 0.01$  vs WT Veh;  
66 Veh n = 6/ genotype, ISRIB n =6/ genotype). Error bars represent mean  $\pm$  SEM.

67



1 **SUPPLEMENTARY METHODS**

2 **Animals.** Homozygous *cacna1c* floxed mice (*cacna1c*<sup>fl/fl,1</sup>) were crossed with mice  
3 expressing Cre recombinase under the control of the *Camk2a* (calcium/calmodulin-  
4 dependent protein kinase II alpha) promoter (*Camk2a*-Cre T29-1;<sup>2</sup> Jackson Laboratories,  
5 Bar Harbor, Maine) to generate heterozygous fbKO (Cre<sup>+/-</sup>, *cacna1c*<sup>fl/fl</sup>) mice. Male and  
6 female Cre<sup>+/-</sup>, *cacna1c*<sup>fl/fl</sup> mice were bred to generate homozygous fbKO (Cre<sup>+/-</sup>,  
7 *cacna1c*<sup>fl/fl</sup>) and WT (Cre<sup>+/-</sup>, *cacna1c*<sup>WT/WT</sup>) experimental mice. Mice were provided food  
8 and water *ad libitum* and maintained on a 12 hour light/dark cycle (from 6 A.M. to 6  
9 P.M.).

10

11 **Electron Microscopy (EM).** Brains from WT mice were processed and dual labeled by  
12 immunocytochemistry using immunoperoxidase and immunogold-silver markers<sup>3</sup> as  
13 described below. Brains were fixed by transcardial perfusion sequentially with 2 ml of  
14 2% heparin in 0.9% saline (1,000 U/ml) and 50 ml of a fixative consisting of 3.75%  
15 acrolein / 2% paraformaldehyde in 0.1 M phosphate buffer (PB; pH 7.4)<sup>3</sup>. Brains were  
16 dissected from the cranium and post-fixed in acrolein / paraformaldehyde for 30  
17 minutes<sup>3</sup>. The methods for tissue processing and dual labeling immunocytochemistry  
18 using immunoperoxidase and immunogold-silver markers were performed as previously  
19 described<sup>3</sup>. Labeling of Ca<sub>v</sub>1.2 and CaMKII was performed by incubating PFC sections  
20 for 48 hour in a cocktail consisting of rabbit anti-Ca<sub>v</sub>1.2 (1:15,000; antibody generated  
21 by Prosci Incorporated, against Ca<sub>v</sub>1.2 peptide sequence  
22 CKYTTKINMDDLQPSNEDKS as previously published<sup>4</sup>) and goat anti-CaMKII-α  
23 (1:1000; Abcam, Cambridge, MA) antisera. Characterization of these reagents is as

24 previously reported<sup>4, 5</sup>. For EM imaging, sections were examined using a Tecnai Biotwin  
25 12 transmission electron microscope (FEI, Hillsboro, OR) interfaced with a digital  
26 camera (Advanced Microscopy Techniques, Danvers, MA) using procedures as  
27 previously described<sup>6</sup>. Images were collected at magnifications ranging from 10,000-  
28 19,000x. Immunoperoxidase labeling was identified by a diffuse brown/black precipitate,  
29 while gold-silver labeling was characterized by dense uniformly black granules. Both  
30 markers are readily distinguishable by visual inspection. Profiles containing Ca<sub>v</sub>1.2  
31 and/or CaMKII immunoreactivity were classified as neuronal (soma, dendrites, axons,  
32 terminals) or glial based on criteria previously described<sup>7</sup>. Criteria for field selection  
33 included good morphological preservation, the presence of immunolabeling in the field,  
34 and proximity to the tissue-plastic interface (i.e., the tissue surface) to minimize  
35 differences in antisera penetration. For preparation of figures, images were adjusted for  
36 contrast and brightness using Adobe Photoshop CS4 software.

37

38 **Stereotaxic Surgery.** Adult mice were anesthetized with a xylazine (20mg/ml) and  
39 ketamine (100mg/ml) cocktail, and mounted in a stereotaxic surgical apparatus (David  
40 Kopf Instruments, Tujunga, CA). An incision was made in the scalp along the midline,  
41 the skin was retracted, and the head was leveled based on the horizontal positions of  
42 bregma and lambda. Two holes were formed through the skull using a 25-gauge needle  
43 and AAV2/2-GFP or AAV2/2-Cre-GFP (Vector Biolabs, Malvern, PA) was delivered  
44 into the PFC with a 2.5ul, 30-gauge Hamilton syringe at a rate of 0.1ul/min for a total  
45 volume of 0.8ul/hemisphere. Stereotaxic coordinates for the PFC were anteroposterior  
46 (AP): +2.3 mm, mediolateral (MV): ±1.7 mm, dorsoventral (DV): -2.8 mm; angled 30°

47 toward the midline in the coronal plane, adopted from Paxinos and Franklin<sup>8</sup>. Mice were  
48 allowed to recover in their home-cage for five weeks prior to behavioral testing.

49

50 **Green Fluorescent Protein (GFP) immunohistochemistry.** GFP immunocytochemistry  
51 was used to confirm placement of surgical injections as described previously<sup>9</sup>. Briefly,  
52 animals were anaesthetized with euthasol and perfused transcardially with 4%  
53 paraformaldehyde (PFA). Brains were dissected, post-fixed overnight in 4% PFA, and  
54 cryo-protected in 30% sucrose at 4°C for at least 72 hours. Brains were sectioned at a  
55 thickness of 40µm using a sliding microtome and sections containing the PFA were  
56 incubated in chicken anti-GFP (1:5000; Aves Lab Inc., Tigard, OR) primary antibody for  
57 24 hours at 4°C. The sections were rinsed in 0.1M phosphate-buffer (PB) and incubated  
58 with donkey anti-chicken Alexa Fluor 488 (1:500; Life Technology, Carlsbad, CA)  
59 antibody for 1 hour at room temperature. Sections were imaged using an epifluorescent  
60 microscope (Leica DM550B with Leica Application Suite Advanced Fluorescence 3.0.0  
61 build 8134 software, Leica Microsystems, Wetzlar, Germany). Animals with improper  
62 bilateral injection placement were excluded from behavioral data analysis.

63

64 **Behavioral testing.**

65 ***Three-chambered social approach test.*** The test apparatus consisted of a white  
66 rectangular apparatus measuring 26.5”x16.5”x 9” that was divided into three equal-sized  
67 chambers with openings that allowed animals free access to all chambers (Figure 1a).  
68 Before the start of the test, the experimental animal was habituated to the central chamber  
69 of the apparatus for 5 minutes followed by an additional 5-minute habituation to all three

70 chambers. Following habituation, the experimental mouse was contained in the center  
71 chamber for 1 minute while the experimenter placed an inverted pencil cup containing a  
72 never-before-met age-matched male C57BL6/J stranger mouse in one end chamber and a  
73 novel object in another pencil cup in the other end chamber. The experimental mouse was  
74 then allowed access to all three chambers and “sociability” was tested during a 5 minute  
75 test using two individual measures: 1) time in the chamber containing the stranger mouse  
76 and the novel object, and 2) time in the contact zones (a 1.5” zone surrounding the pencil  
77 cups) of the stranger mouse and novel object. The experiment was recorded using a  
78 video-camera mounted above the apparatus and the position of the experimental mouse  
79 was tracked using Any-maze software (Stoelting Co., Wood Dale, IL). All measurements  
80 were obtained via automated analyses using AnyMaze (Stoelting Co., Wood Dale, IL).

81

82 ***Fear conditioning.*** All experiments were performed in a sound-attenuated box  
83 (Coulbourn, Whitehall, PA). On day 1, mice were placed in a mouse shock-chamber  
84 (context A) that was scented with 0.1% peppermint odor and presented with five tones  
85 (85dB, 30 seconds, with incrementally increasing inter-trial interval (ITI)) that co-  
86 terminated with a shock (0.7mA, 1 second). For the cue fear memory test, animals were  
87 placed in a novel chamber (context B, circular in shape with white walls and scented with  
88 0.1% lemon odor) and exposed to 5 tones (85dB, 30 seconds, ITI = 30 seconds) during  
89 which their freezing was measured. Data is presented as the percent freezing during  
90 presentation of each 30-second tone. For the contextual fear memory test, animals were  
91 placed back in context A and their freezing to the context was measured for 4.5 minutes.  
92 Data is presented as the percent freezing during the entire test period. The experiment

93 was recorded using FreezeFrame software and the time of freezing was measured via  
94 automated analysis using FreezeView (Coulbourn Instruments, Whitehall, PA).  
95  
96 ***Water-based Y-maze.*** The Y-maze consisted of three equal sized arms with a 120° angle  
97 between each arm (Figure 1g). The maze was filled with water (25-26°C) to a height of  
98 approximately 9” and clouded with non-toxic white tempura paint. On day 1, mice were  
99 placed in the center of the maze and allowed free access to all arms for a total of 6  
100 minutes. The number of arm entries and the number of triads were recorded to calculate  
101 the percent of spontaneous alternations, to measure working memory. On day 2, mice  
102 were subjected to 5 training trials to locate a submerged platform in one arm of the Y-  
103 maze. This was followed by short- (1 hour) and long-term (24 hour and 7 day) memory  
104 tests, each of which consisted of 5 trials. The start position and the location of the  
105 platform were randomized across mice used in the behavioral test. However for each  
106 mouse the chosen start position and location of the platform remained consistent  
107 throughout the entire experiment. During each trial the mouse was allowed free access to  
108 the maze for a total of 1 minute and the latency to locate the submerged platform and  
109 errors made during each trial were recorded. If the platform was not found after 1 minute,  
110 the mouse was picked up and placed on the platform for an additional 15 seconds and  
111 then rescued from the platform. Successes for each animal was calculated based on the  
112 errors made during each trial. An animal that went into the correct arm (the arm that had  
113 the submerged platform) without entering the incorrect arm was given a score of 1 while  
114 an animal that went into the incorrect arm before entering the correct arm was given a  
115 score of 0. For the memory tests, data is presented as an average of the five trials.

116

117 ***Morris water maze (MWM)***. MWM was performed as previously published<sup>10</sup> with slight  
118 modifications. The maze consisted of a circular stainless steel pool with a diameter of 6'  
119 and a depth of 14.5" (Figure 1k) that was filled with water (25-26°C) and clouded with  
120 non-toxic white tempura paint. Four different start positions were designated. Spatial  
121 cues were placed on the wall one foot from the edge of the pool. The maze was virtually  
122 divided into four equal quadrants with one quadrant designated as the "goal" for each  
123 individual mouse. The other quadrants were designated as clockwise, counter-clockwise  
124 and opposite relative to the goal quadrant. The start position and goal quadrant was  
125 randomized across mice used in the behavioral test. On day 1, animals were habituated to  
126 the pool for a total of 4 trials of 1 minute each, during which the mouse was placed in the  
127 center of the pool and allowed free access throughout the pool. On days 2 through 7, mice  
128 received a total of 24 trials (4/ day). During each training trial, the mouse was released  
129 from a different start position and allowed to swim for a maximum of 1 minute to locate a  
130 submerged platform placed in the goal quadrant. Although the start position for each  
131 mouse varied from trial-to-trial, the goal always remained the same throughout the length  
132 of the training. Animals that successfully located the submerged platform were rescued  
133 from the platform and returned to their home cage; those that failed to locate it within 1  
134 minute were placed on the platform for an additional 15 seconds and then returned to  
135 their home cage. During training trials, latency to locate the hidden platform was  
136 measured. Probe tests were performed 1 hour (for short-term memory), 24 hours, and 7  
137 days (for long-term memory) post-training. During each probe test, the mice were placed  
138 in the pool from the exact opposite end of the designated goal quadrant and the amount of

139 time the animal spent in the “goal” quadrant compared to that in the other quadrants was  
140 measured for a total of 1 minute. During the probe trials, the amount of time the animal  
141 spent in the goal quadrant (quadrant that had the submerged platform during training)  
142 compared to each of the other quadrants was measured. All trials were recorded using a  
143 video-camera mounted above the maze and the position was tracked using Any-maze  
144 software (Stoelting Co., Wood Dale, IL).

145

#### 146 **Electrophysiological methods.**

147 ***Acute brain slice preparation.*** Postnatal day (P) 30-P45 mice were anesthetized with  
148 isoflurane and decapitated. Brains were dissected and immersed in ice-cold oxygenated  
149 (95%O<sub>2</sub> and 5%CO<sub>2</sub>) dissection buffer containing (in mM): 83 NaCl, 2.5 KCl, 1  
150 NaH<sub>2</sub>PO<sub>4</sub>, 26.2 NaHCO<sub>3</sub>, 22 glucose, 72 sucrose, 0.5 CaCl<sub>2</sub>, and 3.3 MgCl<sub>2</sub>. Coronal  
151 slices (400 μm) were cut using a vibratome (VT1200S, Leica, Wetzlar, Germany),  
152 incubated in dissection buffer for 40 min at 34°C, and then stored at room temperature.  
153 All slice recordings were performed at 34°C unless otherwise specified. Slices were  
154 visualized using IR differential interference microscopy (DIC; BX51, Olympus, Tokyo,  
155 Japan) and a CMOS camera (Orca-Flash4.0LT, Hamamatsu, Japan). Individual cells were  
156 visualized with a 60x Olympus water immersion (1.0 NA) objective.

157

158 ***Whole-cell recording.*** For all experiments, external recording buffer was oxygenated  
159 (95%O<sub>2</sub> and 5%CO<sub>2</sub>) and contained (in mM): 125 NaCl, 25 NaHCO<sub>3</sub>, 1.25 NaH<sub>2</sub>PO<sub>4</sub>, 3  
160 KCl, 25 dextrose, 1 MgCl<sub>2</sub>, and 2 CaCl<sub>2</sub>. Patch pipettes were fabricated from borosilicate  
161 glass (Sutter Instrument, Novato, CA) to a measured tip resistance of 2-5 MΩ. Signals

162 were amplified with a Multiclamp 700A amplifier (Molecular Devices, Sunnyvale, CA),  
163 digitized with an ITC-18 digitizer (HEKA Instruments Inc., Bellmore, NY) and filtered at  
164 2 KHz. Data were monitored, acquired and in some cases analyzed using AxoGraph X  
165 software (Berkeley, CA). Series resistance was monitored throughout the experiments by  
166 applying a small test voltage step and measuring the capacitive current. Series resistance  
167 was 5~25 M $\Omega$  and only cells with <20% change in series resistance and holding current  
168 were included for analysis. Liquid junction potential was not corrected.

169 To measure spontaneous mini excitatory postsynaptic currents (mEPSCs),  
170 recording pipettes were filled with an internal solution containing (in mM): 125  
171 potassium gluconate (or CsCl for recording mIPSCs), 10 KCl, 10 HEPES, 4 Mg-ATP,  
172 0.3 Na-GTP, 0.1 EGTA, 10 phosphocreatine, 0.05% biocytin, adjusted to pH 7.3 with  
173 KOH and to 278 mOsm with double-distilled H<sub>2</sub>O. Spontaneous mEPSCs were measured  
174 at -80 mV, in the presence of the GABA<sub>A</sub> receptor blocker SR-95531 (Gabazine, 5 $\mu$ M,  
175 Abcam, Cambridge, MA) to isolate  $\alpha$ -amino-3-hydroxy-5-methyl-4-isoxazolepropionic  
176 acid receptor (AMPA)-mediated events. Spontaneous mIPSCs were measured at 0 mV.  
177 To detect events, a variable amplitude template was slid through the 180s chart  
178 recordings<sup>11</sup>. The parameters of the template, including amplitude, 10-90% rise time, and  
179 decay time, were determined based on an average of real events as well as previously  
180 reported values. The detection threshold was 3 to 7 times of the noise standard deviation,  
181 and events with large baseline error were rejected. Data analysis was performed using  
182 Axograph X built-in analysis and IGOR Pro software (Wavemetrics) on a Macintosh  
183 computer.

184



185 **Molecular methods.**

186 **SUnSET.** Adult mice were anesthetized with an isoflurane vaporizer (at 1.5%) and  
187 mounted in a stereotaxic surgical apparatus (David Kopf Instruments, Tujunga, CA). The  
188 head was leveled based on the horizontal positions of bregma and lambda, and an  
189 incision was made in the scalp along the midline. The skin was retracted and a single hole  
190 was formed through the skull using a 25-gauge needle using the following coordinates for  
191 the lateral ventricle (AP: -0.2; ML: -1.0; DV: -2.4). Puromycin (Sigma, St. Louis, MO),  
192 at a concentration of 10 $\mu$ g/ $\mu$ l, was injected into the lateral ventricle at a rate of 0.4 $\mu$ l/min  
193 for a total volume of 2.5 $\mu$ l. Animals were sutured and allowed to recover. For basal  
194 protein synthesis measurements, animals were euthanized one-hour post injection, and the  
195 PFC, somatosensory cortex and hippocampus were dissected on dry ice. For general  
196 protein synthesis measurements with acute ISRIB treatment, ISRIB was injected  
197 intraperitoneally at the start of puromycin infusion and animals were euthanized 90  
198 minutes later. Western blot analysis using total fractions was performed as described  
199 below. 100 $\mu$ g total protein was separated on a 10% gel and probed with an antibody  
200 against puromycin (#MABE343, Millipore, Temecula, CA) at a dilution of 1:500 for the  
201 primary antibody and 1:5000 for the secondary. Tubulin was used as a loading control at  
202 a dilution of 1:60,000 for the primary and 1:100,000 for the secondary.

203

204 **Subcellular fractionation and immunoblotting.** Adult mice were decapitated, brains  
205 were dissected, and crude dissections of the PFC were performed using a 17-gauge  
206 stainless steel stylet. For total protein lysates, tissue was sonicated in SDS lysis buffer  
207 (1%SDS in 1X TE, pH 7.4) containing protease and phosphatase inhibitors as previously

208 described<sup>12</sup>. Synaptoneurosomes were generated as previously published<sup>13</sup>. Briefly, tissue  
209 was homogenized in 0.3M sucrose/ 0.01mM HEPES buffer containing protease and  
210 phosphatase inhibitors and centrifuged at 1000xg. The supernatant was spun again at  
211 1000xg. The obtained supernatant was spun at 12,000xg and the resulting pellet was  
212 resuspended in 4mM HEPES/ 1mM EDTA buffer and used as the synaptoneurosome  
213 fraction. Protein concentrations were determined using the BCA assay and protein lysates  
214 were separated on a 10% SDS gel along with a Kaleidoscope-prestained protein standard  
215 (Bio-Rad, Hercules, CA). Blots were blocked in 5% non-fat dry milk for 1 hour and  
216 incubated in primary antibody (see Supplementary Table 1) for 12-48 hours on a shaker  
217 at 4°C. Incubation in secondary antibody (see Supplementary Table 1) was performed at  
218 room temperature for 1 hour in horseradish peroxidase-linked IgG conjugated antibody.  
219 Membranes were visualized using Western Lightning Chemiluminescence solution  
220 (Perkin Elmer Life Science, Boston, MA) and optical density was analyzed using NIH  
221 Image (NIH, Bethesda, MD). Proteins were normalized to either GAPDH or tubulin,  
222 which was used as a loading control. Data in figures 3a and 3e were analyzed from  
223 images obtained with the ChemiDoc Imaging System (Bio-Rad, Hercules, CA). All other  
224 western analyses were done using X-ray film.

225

226 **BDNF ELISA.** Tissue was homogenized in lysis buffer containing (150mM NaCl, 1%  
227 Triton X-100, 25mM HEPES, 2mM NaF) and incubated on a rotating nutator at 4°C for 1  
228 hour. Homogenized tissue was centrifuged at 20,000xg and the supernatant containing  
229 total protein was quantified using the BCA protein assay. Mature BDNF protein was

230 measured using the BDNF Emax ImmunoAssay System (Promega, Madison, WI) as  
231 previously published<sup>14</sup>.

232

233 **Quantitative Real-Time PFC (QPCR).** RNA was extracted and QPCR was performed  
234 as previously described<sup>15</sup>. *Cacna1c* (QuantiTect Primer assay QT00150752; Qiagen)  
235 mRNA levels were measured using mRNA-specific primers and normalized to *GapDH*  
236 (QuantiTect Primer assay QT01658692; Qiagen). All samples were performed in  
237 triplicate, and the values were averaged.

238

239

240 **REFERENCES**

241

242 1. Moosmang S, Haider N, Klugbauer N, Adelsberger H, Langwieser N, Müller J *et al.*  
243 *al.* Role of hippocampal Cav1.2 Ca<sup>2+</sup> channels in NMDA receptor-independent  
244 synaptic plasticity and spatial memory. *The Journal of neuroscience : the official*  
245 *journal of the Society for Neuroscience* 2005; **25**(43): 9883-9892.

246

247 2. Tsien JZ, Chen DF, Gerber D, Tom C, Mercer EH, Anderson DJ *et al.* Subregion-  
248 and cell type-restricted gene knockout in mouse brain. *Cell* 1996; **87**(7): 1317-  
249 1326.

250

251 3. Glass MJ, Wang G, Coleman CG, Chan J, Ogorodnik E, Van Kempen TA *et al.*  
252 NMDA Receptor Plasticity in the Hypothalamic Paraventricular Nucleus  
253 Contributes to the Elevated Blood Pressure Produced by Angiotensin II. *The*  
254 *Journal of neuroscience : the official journal of the Society for Neuroscience*  
255 2015; **35**(26): 9558-9567.

256

257 4. Tippens AL, Pare JF, Langwieser N, Moosmang S, Milner TA, Smith Y *et al.*  
258 Ultrastructural evidence for pre- and postsynaptic localization of Cav1.2 L-type  
259 Ca<sup>2+</sup> channels in the rat hippocampus. *J Comp Neurol* 2008; **506**(4): 569-583.

260

261 5. Gan JO, Bowline E, Lourenco FS, Pickel VM. Adolescent social isolation  
262 enhances the plasmalemmal density of NMDA NR1 subunits in dendritic spines

- 263 of principal neurons in the basolateral amygdala of adult mice. *Neuroscience*  
264 2014; **258**: 174-183.
- 265
- 266 6. Beckerman MA, Van Kempen TA, Justice NJ, Milner TA, Glass MJ.  
267 Corticotropin-releasing factor in the mouse central nucleus of the amygdala:  
268 ultrastructural distribution in NMDA-NR1 receptor subunit expressing neurons as  
269 well as projection neurons to the bed nucleus of the stria terminalis. *Exp Neurol*  
270 2013; **239**: 120-132.
- 271
- 272 7. Peters A, Palay SL, Webster HD. The fine structure of the nervous system. 1991.  
273
- 274 8. Paxinos G, Franklin KBJ. *The Mouse Brain in Stereotaxic Coordinates. 2nd*  
275 *Edition*. Academic Press 2001.
- 276
- 277 9. Lee AS, Ra S, Rajadhyaksha AM, Britt JK, De Jesus-Cortes H, Gonzales KL *et*  
278 *al*. Forebrain elimination of cacna1c mediates anxiety-like behavior in mice. *Mol*  
279 *Psychiatry* 2012; **17**(11): 1054-1055.
- 280
- 281 10. Vorhees CV, Williams MT. Morris water maze: procedures for assessing spatial  
282 and related forms of learning and memory. *Nat Protoc* 2006; **1**(2): 848-858.
- 283
- 284 11. Clements JD, Bekkers JM. Detection of spontaneous synaptic events with an  
285 optimally scaled template. *Biophys J* 1997; **73**(1): 220-229.

286

287 12. Tropea TF, Kabir ZD, Kaur G, Rajadhyaksha AM, Kosofsky BE. Enhanced  
288 dopamine D1 and BDNF signaling in the adult dorsal striatum but not nucleus  
289 accumbens of prenatal cocaine treated mice. *Front Psychiatry* 2011; **2**: 67.

290

291 13. Knackstedt LA, Moussawi K, Lalumiere R, Schwendt M, Klugmann M, Kalivas  
292 PW. Extinction training after cocaine self-administration induces glutamatergic  
293 plasticity to inhibit cocaine seeking. *The Journal of neuroscience : the official  
294 journal of the Society for Neuroscience* 2010; **30**(23): 7984-7992.

295

296 14. Kabir ZD, Katzman AC, Kosofsky BE. Molecular mechanisms mediating a  
297 deficit in recall of fear extinction in adult mice exposed to cocaine in utero. *PloS  
298 one* 2013; **8**(12): e84165.

299

300 15. Schierberl K, Hao J, Tropea TF, Ra S, Giordano TP, Xu Q *et al.* Cav1.2 L-type  
301 Ca<sup>2+</sup> channels mediate cocaine-induced GluA1 trafficking in the nucleus  
302 accumbens, a long-term adaptation dependent on ventral tegmental area Ca(v)1.3  
303 channels. *The Journal of neuroscience : the official journal of the Society for  
304 Neuroscience* 2011; **31**(38): 13562-13575.

305

306

307

**Supplementary Table 1.** List of antibodies used for immunoblotting.

| <b>Antibody</b>    | <b>Company</b>              | <b>Cat #</b> | <b>Dilutions<br/>(primary/<br/>secondary)</b> | <b>Secondary</b> | <b>Mol Wt<br/>(kDa)</b> |
|--------------------|-----------------------------|--------------|-----------------------------------------------|------------------|-------------------------|
| mTOR               | Cell Signaling, Danvers, MA | 2972         | 1:1000/ 1:5000                                | HRP $\alpha$ Rb  | 289                     |
| P-mTOR<br>S2448    | Cell Signaling, Danvers, MA | 2971         | 1:1000/ 1:5000                                | HRP $\alpha$ Rb  | 289                     |
| 4EBP1              | Cell Signaling, Danvers, MA | 9459         | 1:1000/ 1:5000                                | HRP $\alpha$ Rb  | 15-25                   |
| P-4EBP1<br>T37/46  | Cell Signaling, Danvers, MA | 9459         | 1:1000/ 1:5000                                | HRP $\alpha$ Rb  | 15-25                   |
| eIF4B              | Cell Signaling, Danvers, MA | 3592         | 1:1000/ 1:5000                                | HRP $\alpha$ Rb  | 80                      |
| P-eIF4B<br>S422    | Cell Signaling, Danvers, MA | 3591         | 1:1000/ 1:5000                                | HRP $\alpha$ Rb  | 80                      |
| eEF2               | Cell Signaling, Danvers, MA | 2332         | 1:1000/ 1:5000                                | HRP $\alpha$ Rb  | 95                      |
| P-eEF2<br>T56      | Cell Signaling, Danvers, MA | 2331         | 1:1000/ 1:5000                                | HRP $\alpha$ Rb  | 95                      |
| rpS6               | Cell Signaling, Danvers, MA | 2217         | 1:1000/ 1:5000                                | HRP $\alpha$ Rb  | 32                      |
| P-rpS6<br>S235/236 | Cell Signaling, Danvers, MA | 2211         | 1:500/ 1:5000                                 | HRP $\alpha$ Rb  | 32                      |
| P-rpS6<br>S240/244 | Cell Signaling, Danvers, MA | 2215         | 1:1000/ 1:5000                                | HRP $\alpha$ Rb  | 32                      |
| eIF2 $\alpha$      | Cell Signaling, Danvers, MA | 9722         | 1:1000/ 1:5000                                | HRP $\alpha$ Rb  | 38                      |
| P-eIF2 $\alpha$    | Cell Signaling, Danvers, MA | 3398         | 1:1000/ 1:5000                                | HRP $\alpha$ Rb  | 38                      |

|                     |                                    |                |                       |                            |     |
|---------------------|------------------------------------|----------------|-----------------------|----------------------------|-----|
| S51                 |                                    |                |                       |                            |     |
| GAPDH               | Abcam, Cambridge, MA               | ab2255<br>5    | 1:20,000/<br>1:40,000 | HRP $\alpha$ Rb            | 37  |
| Tubulin             | Sigma, St. Louis, MO               | T5168          | 1:10,000/<br>1:30,000 | HRP $\alpha$ Ms            | 50  |
| Ca <sub>v</sub> 1.2 | Alomone Labs, Jerusalem,<br>Israel | AGP-<br>001    | 1:300/ 1:5000         | HRP $\alpha$<br>Guinea pig | 250 |
| VGlut               | Neuromab, Davis, CA                | Clone<br>N28/9 | 1:1000/ 1:5000        | HRP $\alpha$ Rb            | 52  |
| VGat                | Synaptic Systems, Germany          | 131<br>002     | 1:1000/ 1:5000        | HRP $\alpha$ Rb            | 57  |
